# Supplementary material for: Male reproductive system and spermatogenesis of Limodromus assimilis (Paykull 1790)
Source: PLoS One. 2017 Jul 19;12(7):e0180492. doi: 10.1371/journal.pone.0180492 (PMC5516968; doi:10.1371/journal.pone.0180492)
Supplement: S1 Table — (XLSX) [file pone.0180492.s004.xlsx]

## Sheet: Tabelle2
Raw data - S1 Table. Size of the different organs of the reproductive system and the spermatozoa
	Testis		Follicle		Vas efferens	Vas deferens I		Vas deferens II	Seminal vesicles		Accessory glands		Ductus ejaculatorius	Aedeagus	Spermatozoa	Sperm bundles
	Length (µm)	Width (µm)	Length (µm)	Width (µm)	Length (µm)	Smallest width (µm)	Biggest width (µm)	Width (µm)	Length (µm)	Width (µm)	Length (µm)	Width (µm)	Width (µm)	Length (µm)	Length (µm)	Length (µm)
	4387	1751	102224	140	52	28	61	70	3706	198	5167	429	256	2435	292.5	346
	3824	1495	92499	161	48			71	3694	192	5006	400	287	2500	302.5	364
	2831	1438	142053	168	45			74	5803	166	5334	421	242	2542	301.7	391
	3005	1167	104003	186	50			73	6032	186	6345	394	262	2616	300.1	248
	3669	1518	145004	152	49			75	5324	169	4354	401	227	2509	328.1	343
	4682	1887	117861	137	49			78	6116	140	4309	501	216	2490	332	326
	3902	2175	118920	178	48			73	4733	137	5626	459	201	2606	328.3	286
	3773	2030		180	51			70	3845	147	5686	432	208	2546	278.3	340
	4470	1884		176	52			68	5229	107	5049	452	196	2545	329.8	295
	4023	2163		154	47			72	5165	171	4830	454	244	2511	296.5	325
	3723	2410		168					5832	233	5932	384		2289	322.8	300
	3267	1881		146					6697	241	6139	471		2506	333.6	307
	3521	2040		162					4933	147	5202	373		2357	321	390
	3427	2078							4203	164	5097	382			310.5	356
	4244	2101							7359	277	4116	416			274	403
	3734	1978									3612	313			288.1
	3245	1746									4431	405
											6102	400
n	17	17	7	13	10	1	1	10	15	15	18	18	10	13	16	15
Mean	3748.65	1867.18	117509	162.154	49.1	28	61	72.4	5244.73	178.333	5129.83	415.944	233.9	2496.31	308.738	334.667
Sd	496.615	307.612	18524.3	15.0734	2.11896	0	0	2.72764	1058.41	43.2137	741.469	41.6793	27.9694	87.6851	19.1168	41.6616
